# Supplementary material for: Regulation of axonal morphogenesis by the mitochondrial protein Efhd1
Source: PubMed Central journal article supplement (PMC7232985; doi:10.26508/lsa.202000753), 2020-05-15

Figure 5, Figure S5

Efhd1 WT and KO soma and axons E13.5

P-AMPK soma

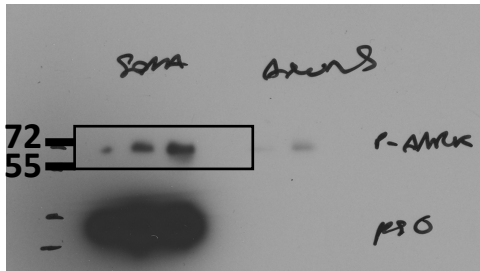

AMPK total soma+ axons

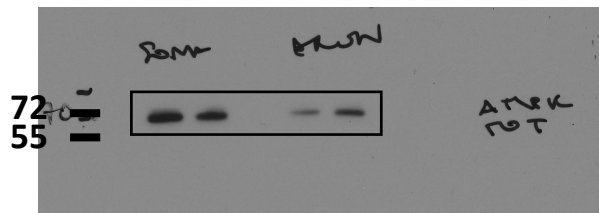

P-AMPK axons

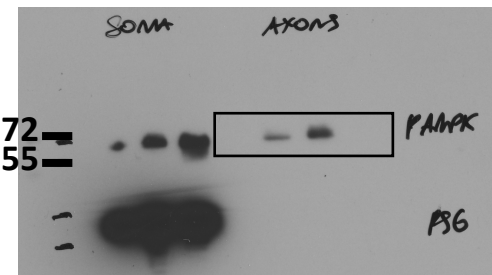

$\alpha$ - $\beta$ III-tubulin soma+ axons

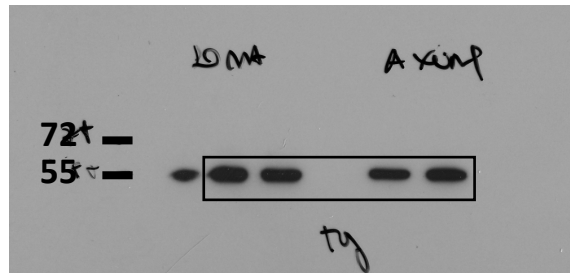

P-ACC soma + ACC total axons

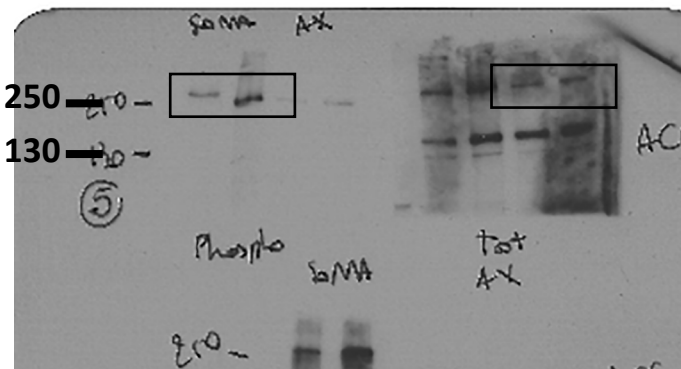

ACC total soma

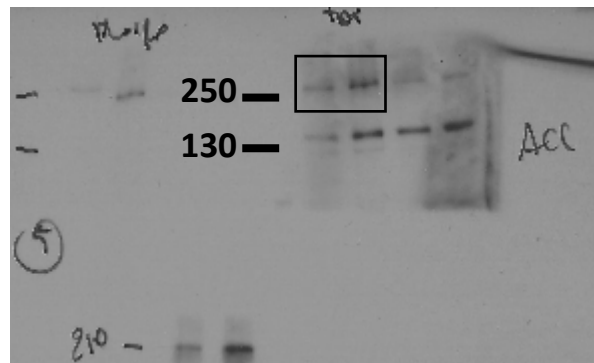

P-ACC axons

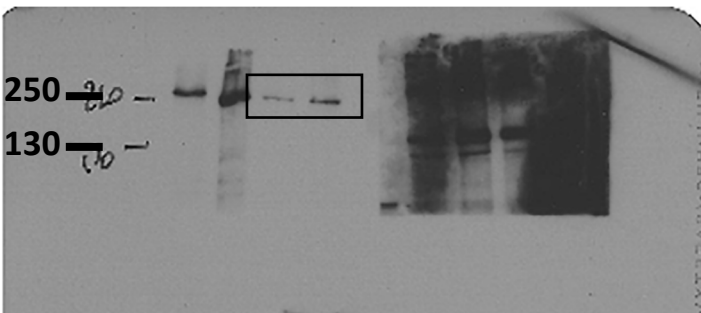

$\alpha$ - $\beta$ III-tubulin soma+ axons

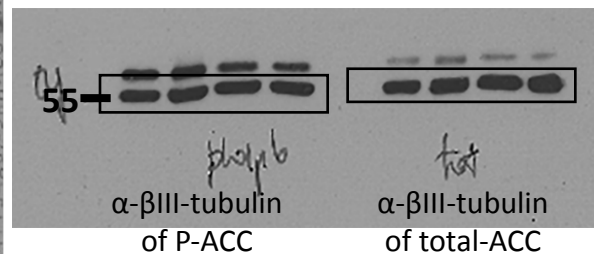

P-Ulk soma

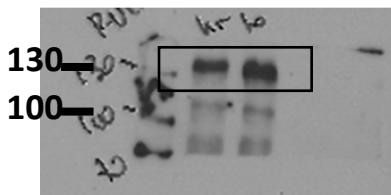

P-Ulk axons

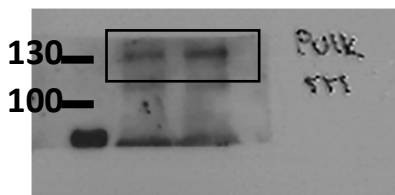

Ulk total soma

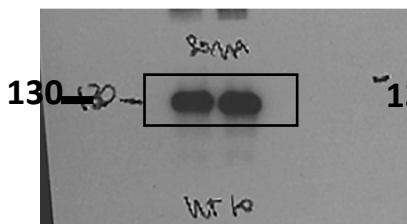

Ulk total axons

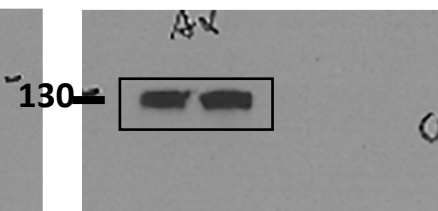

$\alpha$ - $\beta$ III-tubulin soma

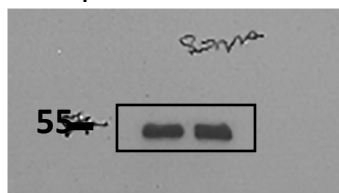

$\alpha$ - $\beta$ III-tubulin axons

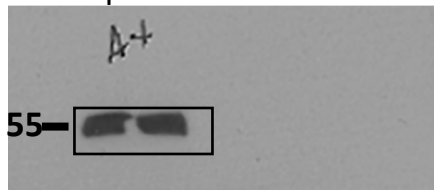

### Efhd1 WT and KO DRGs E 17.5

P-AMPK E17.5

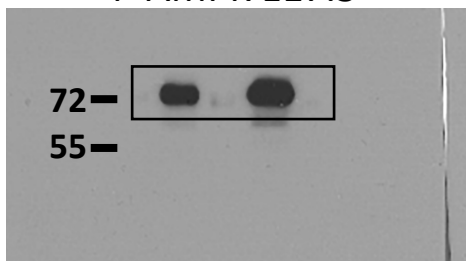

AMPK total E17.5

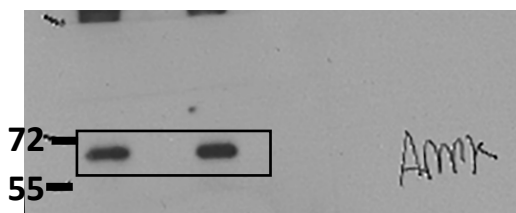

$\alpha$ - $\beta$ III-tubulin of AMPK

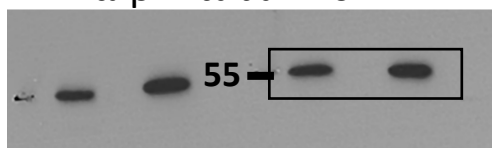

P-Ulk E17.5

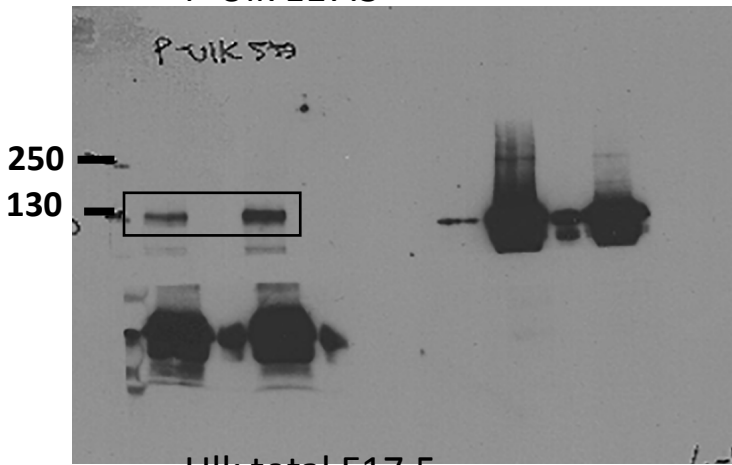

Ulk total E17.5

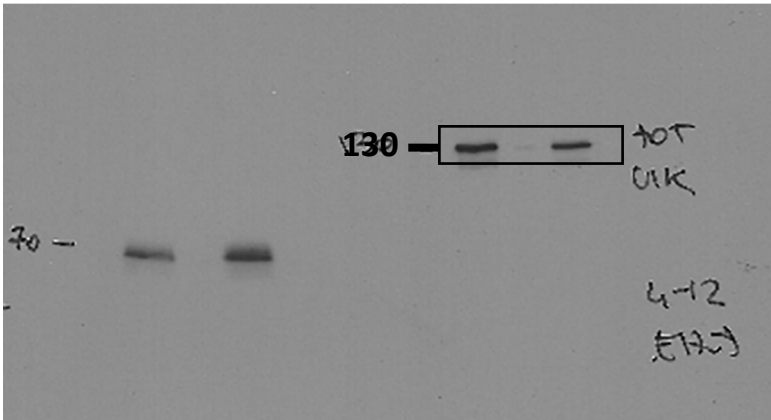

$\alpha$ - $\beta$ III-tubulin P-Ulk e17.5

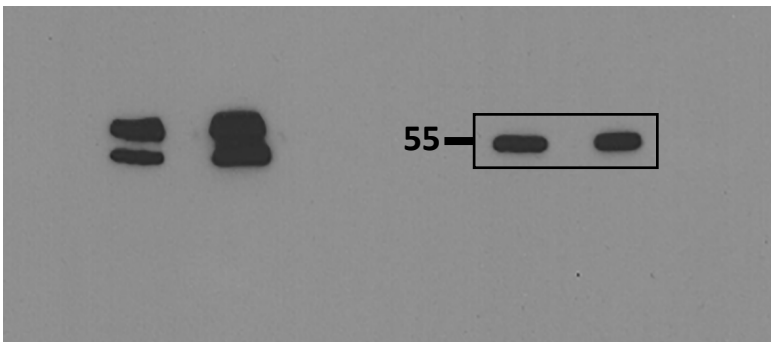

# Efh1 WT and KO DRGs E 13.5

LC3-II +/- Bafilomycin

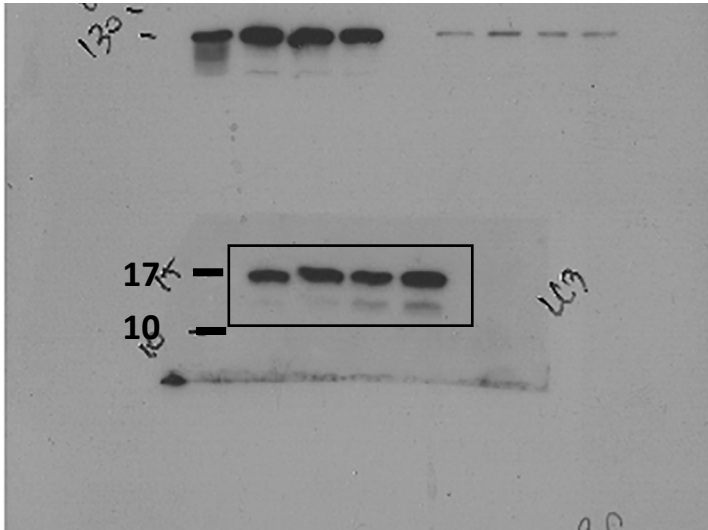

$\alpha$ - $\beta$ III-tubulin of LC3-II

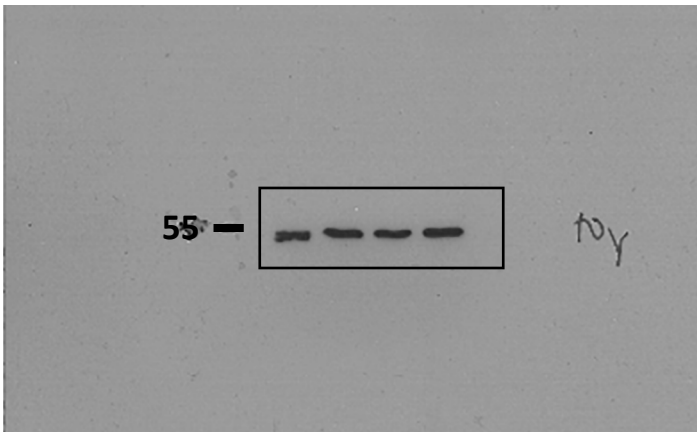

Supplement: LSA-2020-00753_SdataF5.pdf [file LSA-2020-00753_SdataF5.pdf]
