# Supplementary material for: Regulation of axonal morphogenesis by the mitochondrial protein Efhd1
Source: PubMed Central journal article supplement (PMC7232985; doi:10.26508/lsa.202000753), 2020-05-15

Figure S1

Lkb1 WT and KO soma and axons: ACC and AMPK phosphorylation level

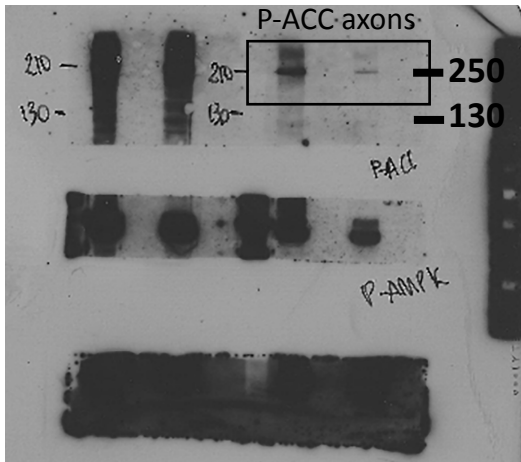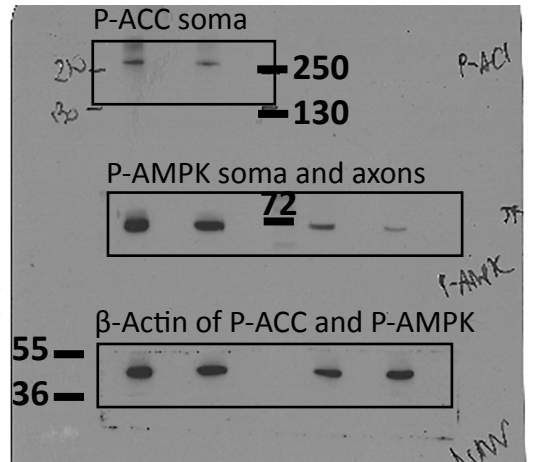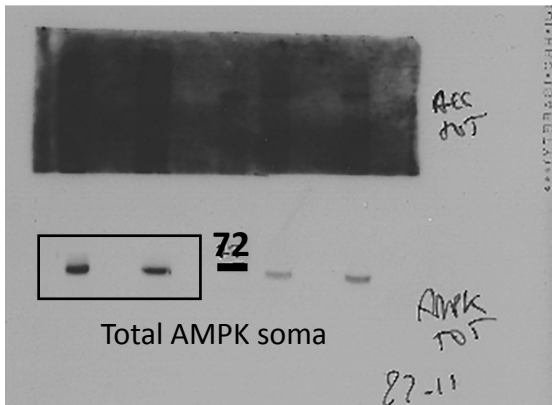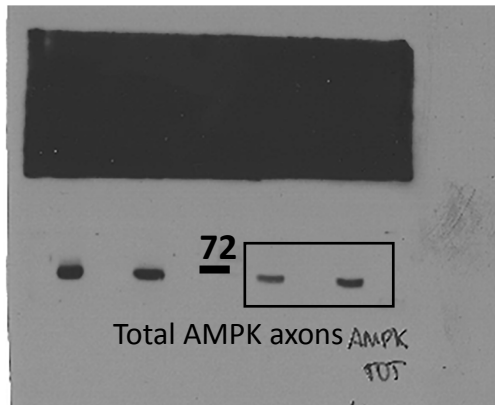

Total ACC soma and axons

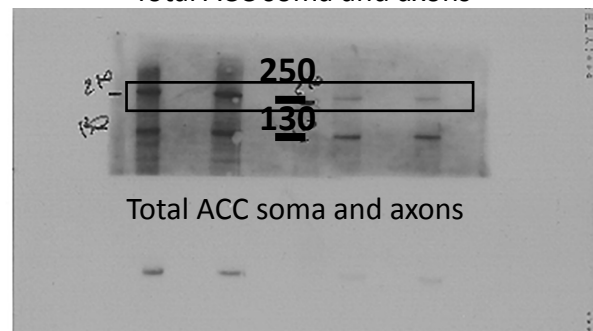

Lkb1 WT and KO DRGs:  
Lkb1 protein level

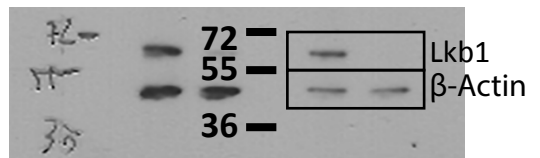

Supplement: LSA-2020-00753_SdataFS1.pdf [file LSA-2020-00753_SdataFS1.pdf]
