# Supplementary material for: Regulation of axonal morphogenesis by the mitochondrial protein Efhd1
Source: PubMed Central journal article supplement (PMC7232985; doi:10.26508/lsa.202000753), 2020-05-15

# Figure S3

## Efhd1 WT and KO DRGs: Efhd1 protein level

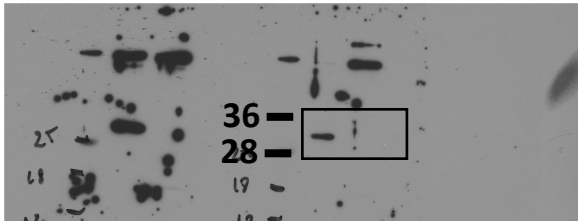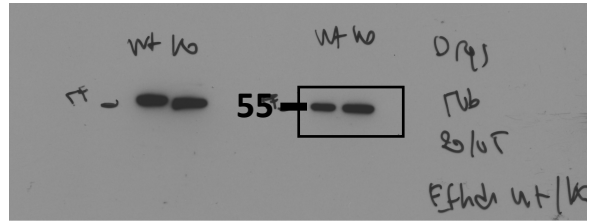

Supplement: LSA-2020-00753_SdataFS3.pdf [file LSA-2020-00753_SdataFS3.pdf]
